# Supplementary material for: Synthesis, structural analysis, electrochemical and magnetic properties of tetrachloroferrate ionic liquids
Source: Royal Society of Chemistry journal article supplement (doi:10.1039/d1nj01400e), 2021-01-01
Supplement: d1nj01400e1.pdf [file d1nj01400e1.pdf]

## Supplementary Information

### Synthesis, structural analysis, electrochemical and magnetic properties of tetrachloroferrate(III) ionic liquids

Anham Zafar<sup>ab</sup>, Imtiaz Ud Din<sup>b</sup>, Safeer Ahmed<sup>b</sup>, Dejan-Krešimir Bučar<sup>a</sup>, Muhammad Nawaz Tahir<sup>c</sup>, Robert G. Palgrave<sup>a\*</sup>

- a. Department of Chemistry, University College London, 20 Gordon Street, London, WC1E 0AJ, UK
- b. Department of Chemistry, Quaid-i-Azam University, Islamabad 45320, Pakistan
- c. Department of Physics, University of Sargodha, Sargodha 40100, Pakistan

#### Table of Contents

|                                                                        |    |
|------------------------------------------------------------------------|----|
| 1. Supplementary crystallographic data for <b>2</b> and <b>6</b> ..... | 2  |
| 2. Cyclic Voltammetric diagrams ( <b>1-8</b> ) .....                   | 4  |
| 3. Peak Search Results in positive potential ( <b>1-8</b> ) .....      | 7  |
| 4. Peak Search Results in negative potential ( <b>1-8</b> ) .....      | 8  |
| 5. Mass spectrometry ( <b>1-8</b> ) .....                              | 9  |
| 6. NMR spectrometry ( <b>1-8</b> ) .....                               | 13 |
| 7. Raman Spectroscopy.....                                             | 20 |
| 8. Magnetic studies .....                                              | 20 |

## 1. Supplementary crystallographic data for (2) and (6)

**Table S1.** Bond lengths for (2) and (6).

| Atom       | Atom | Length/Å  | Atom | Atom | Length/Å |
|------------|------|-----------|------|------|----------|
| <b>(2)</b> |      |           |      |      |          |
| Fe1        | Cl4  | 2.1853(8) | N2   | C3   | 1.387(3) |
| Fe1        | Cl3  | 2.1912(8) | N2   | C9   | 1.463(4) |
| Fe1        | Cl2  | 2.1938(8) | C2   | C7   | 1.383(4) |
| Fe1        | Cl1  | 2.1967(7) | C2   | C3   | 1.388(4) |
| N1         | C1   | 1.313(3)  | C3   | C4   | 1.382(4) |
| N1         | C2   | 1.380(3)  | C4   | C5   | 1.376(5) |
| N1         | C8   | 1.471(3)  | C5   | C6   | 1.387(5) |
| N2         | C1   | 1.317(3)  | C6   | C7   | 1.355(5) |
| <b>(6)</b> |      |           |      |      |          |
| Fe1        | Cl1  | 2.1991(5) | C2   | C3   | 1.377(3) |
| Fe1        | Cl4  | 2.1948(5) | C16  | C21  | 1.382(2) |
| Fe1        | Cl2  | 2.1957(5) | C16  | C17  | 1.385(2) |
| Fe1        | Cl3  | 2.1937(5) | C16  | C15  | 1.509(2) |
| N1         | C14  | 1.392(2)  | C21  | C20  | 1.387(3) |
| N1         | C8   | 1.328(2)  | C10  | C11  | 1.382(3) |
| N1         | C1   | 1.471(2)  | C17  | C18  | 1.382(3) |
| N2         | C9   | 1.391(2)  | C13  | C12  | 1.375(3) |
| N2         | C8   | 1.323(2)  | C20  | C19  | 1.375(3) |
| N2         | C15  | 1.474(2)  | C19  | C18  | 1.383(3) |
| C14        | C9   | 1.390(2)  | C12  | C11  | 1.393(3) |
| C14        | C13  | 1.391(2)  | C7   | C6   | 1.394(3) |

**Table S2.** Bond Angles for (2) and (6).

| Atom       | Atom | Atom | Angle/°   | Atom | Atom | Atom | Angle/°  |
|------------|------|------|-----------|------|------|------|----------|
| <b>(2)</b> |      |      |           |      |      |      |          |
| Cl4        | Fe1  | Cl3  | 110.00(3) | N1   | C1   | N2   | 111.0(2) |
| Cl4        | Fe1  | Cl2  | 110.39(3) | N1   | C2   | C7   | 131.6(2) |
| Cl3        | Fe1  | Cl2  | 109.12(3) | N1   | C2   | C3   | 106.1(2) |
| Cl4        | Fe1  | Cl1  | 111.13(3) | C7   | C2   | C3   | 122.2(3) |
| Cl3        | Fe1  | Cl1  | 110.09(3) | C4   | C3   | N2   | 132.3(3) |
| Cl2        | Fe1  | Cl1  | 106.02(3) | C4   | C3   | C2   | 121.1(3) |
| C1         | N1   | C2   | 108.5(2)  | N2   | C3   | C2   | 106.6(2) |
| C1         | N1   | C8   | 126.5(2)  | C5   | C4   | C3   | 116.3(3) |

| Atom       | Atom | Atom | Angle/°    | Atom | Atom | Atom | Angle/°    |
|------------|------|------|------------|------|------|------|------------|
| <b>(2)</b> |      |      |            |      |      |      |            |
| C2         | N1   | C8   | 125.0(2)   | C4   | C5   | C6   | 122.0(3)   |
| C1         | N2   | C3   | 107.7(2)   | C7   | C6   | C5   | 122.2(3)   |
| C1         | N2   | C9   | 126.6(3)   | C6   | C7   | C2   | 116.2(3)   |
| C3         | N2   | C9   | 125.6(3)   |      |      |      |            |
| <b>(6)</b> |      |      |            |      |      |      |            |
| C14        | Fe1  | C11  | 107.16(2)  | C21  | C16  | C17  | 119.18(16) |
| C14        | Fe1  | C12  | 110.66(2)  | C21  | C16  | C15  | 120.57(16) |
| C12        | Fe1  | C11  | 109.49(2)  | C17  | C16  | C15  | 120.24(16) |
| C13        | Fe1  | C11  | 111.17(2)  | N2   | C8   | N1   | 110.80(14) |
| C13        | Fe1  | C14  | 110.05(2)  | C16  | C21  | C20  | 120.25(17) |
| C13        | Fe1  | C12  | 108.31(2)  | C11  | C10  | C9   | 115.87(17) |
| C14        | N1   | C1   | 126.57(14) | C18  | C17  | C16  | 120.60(16) |
| C8         | N1   | C14  | 107.94(14) | C12  | C13  | C14  | 115.85(17) |
| C8         | N1   | C1   | 125.48(14) | C19  | C20  | C21  | 120.27(17) |
| C9         | N2   | C15  | 125.94(15) | C20  | C19  | C18  | 119.81(17) |
| C8         | N2   | C9   | 108.19(13) | N2   | C15  | C16  | 111.43(14) |
| C8         | N2   | C15  | 125.86(15) | C17  | C18  | C19  | 119.90(17) |
| C9         | C14  | N1   | 106.55(14) | C13  | C12  | C11  | 122.05(17) |
| C9         | C14  | C13  | 122.18(15) | N1   | C1   | C2   | 113.05(14) |
| C13        | C14  | N1   | 131.27(15) | C2   | C7   | C6   | 119.76(19) |
| C14        | C9   | N2   | 106.50(14) | C2   | C3   | C4   | 120.97(19) |
| C10        | C9   | N2   | 131.73(16) | C10  | C11  | C12  | 122.26(17) |
| C10        | C9   | C14  | 121.75(16) | C5   | C4   | C3   | 119.9(2)   |
| C7         | C2   | C1   | 121.88(17) | C4   | C5   | C6   | 119.90(19) |
| C3         | C2   | C1   | 119.01(17) | C5   | C6   | C7   | 120.4(2)   |
| C3         | C2   | C7   | 119.02(17) |      |      |      |            |

## 2. Cyclic voltammetric diagrams (1-8)

Positive Potential

Negative Potential

(1)

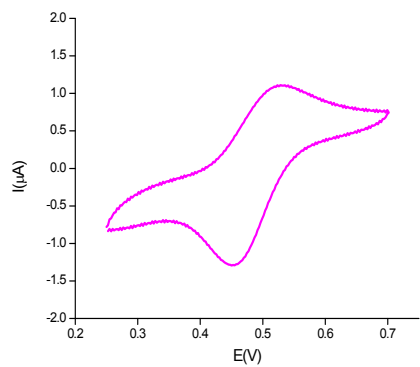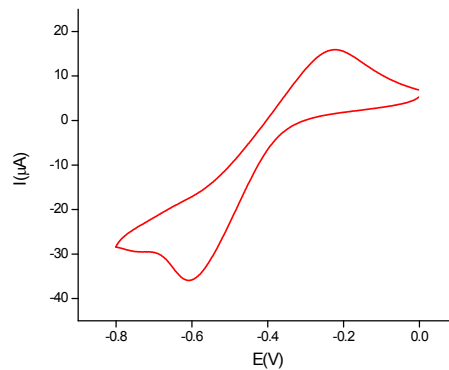

(2)

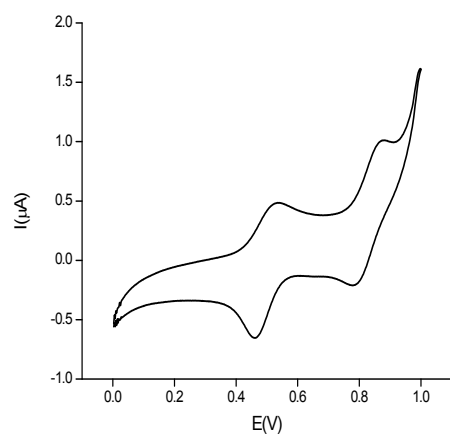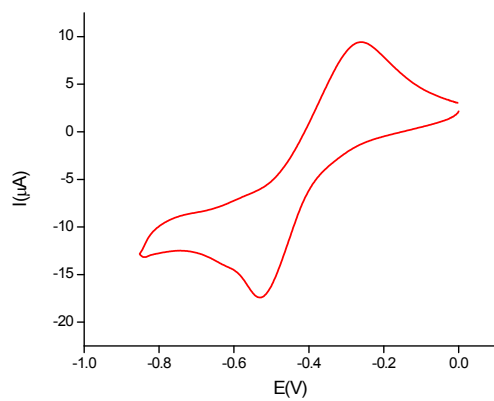

(3)

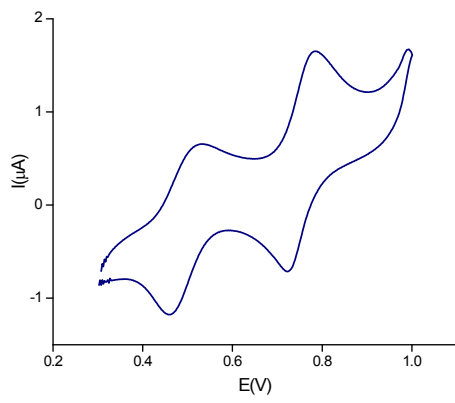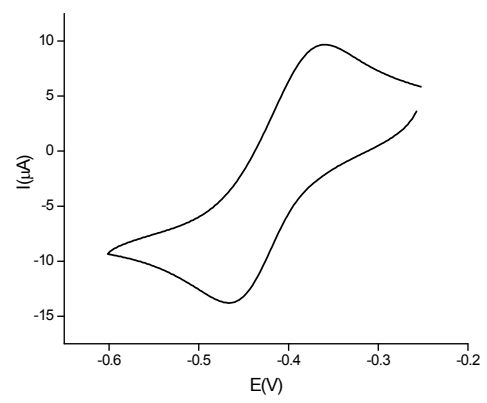

(4)

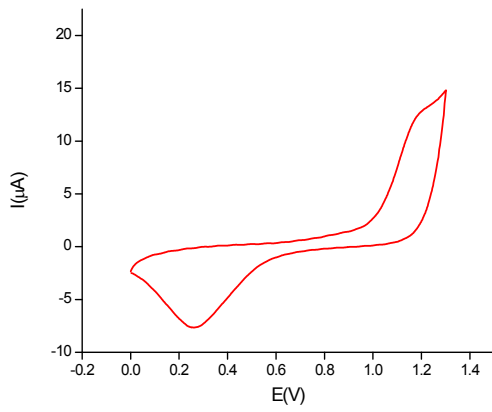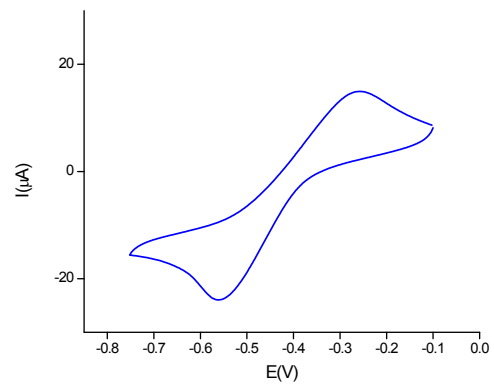

(5)

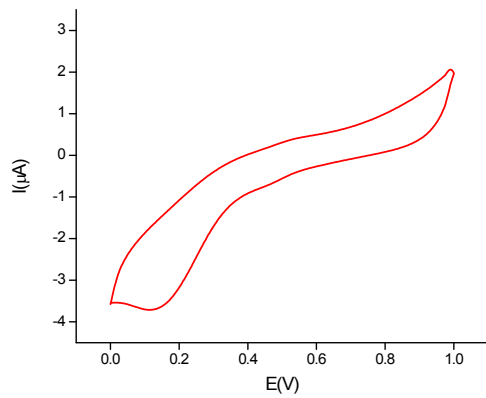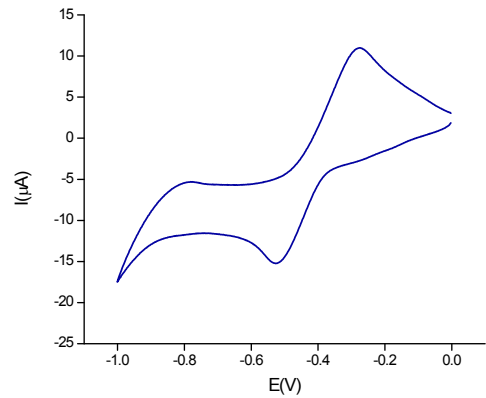

(6)

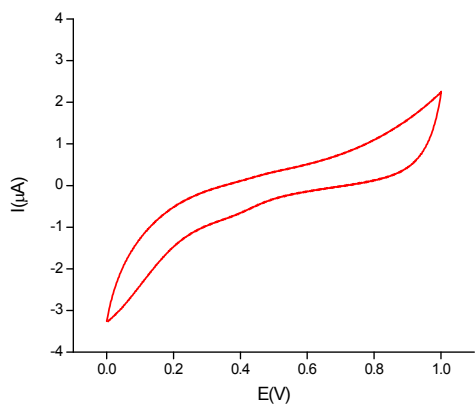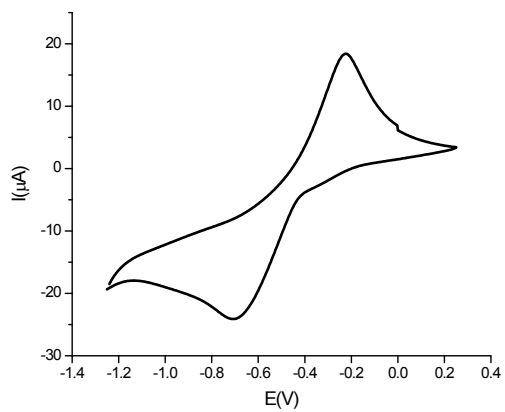

(7)

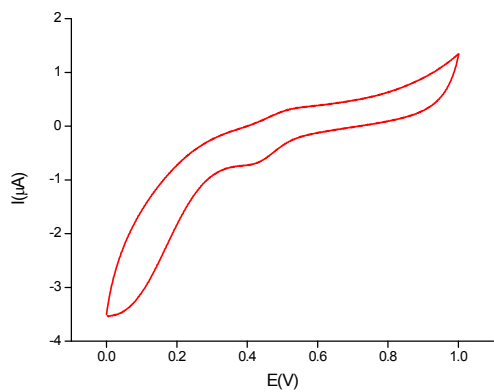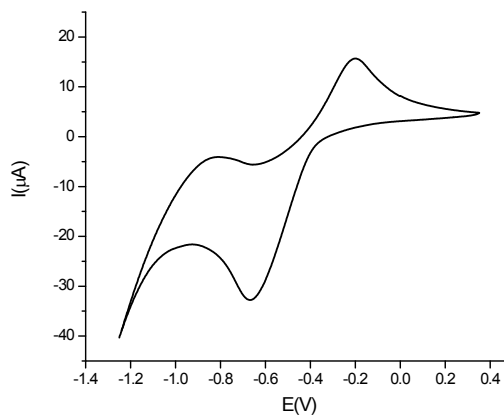

(8)

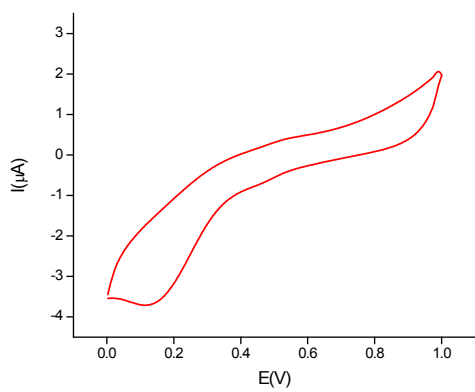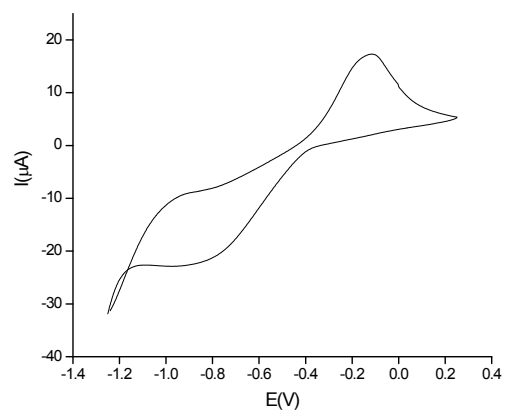

### 3. Peak search results in positive potential

**Table S3. Electrochemical peak search results in positive potential**

| MILs       | Position  | Height     | Area (C)  | Width (1/2) | Derivative | Ep-Ep/2 (V) |
|------------|-----------|------------|-----------|-------------|------------|-------------|
| <b>(1)</b> |           |            |           |             |            |             |
|            | 5.209e-01 | 8.004e-07  | 2.258e-06 | 1.343e-01   | 1.731e-05  | 5.764e-02   |
|            | 4.575e-01 | -1.104e-0  | 2.389e-06 | 1.001e-01   | 3.101e-05  | -4.804e-02  |
| <b>(2)</b> |           |            |           |             |            |             |
|            | 5.502e-01 | 1.032e-07  | 1.802e-07 | 8.789e-02   | 5.793e-06  | 3.092e-02   |
|            | 8.994e-01 | 2.868e-08  | 2.853e-08 | 4.883e-02   | 2.914e-06  | 1.856e-02   |
|            | 7.895e-01 | -4.227e-07 | 1.156e-06 | 1.221e-01   | 8.953e-06  | -5.418e-02  |
|            | 4.697e-01 | -4.902e-07 | 9.531e-07 | 9.277e-02   | 1.469e-05  | -4.542e-02  |
| <b>(3)</b> |           |            |           |             |            |             |
|            | 5.344e-01 | 1.276e-07  | 1.772e-07 | 7.080e-02   | 9.344e-06  | 2.694e-02   |
|            | 7.785e-01 | 8.257e-07  | 1.681e-06 | 9.766e-02   | 2.507e-05  | 3.756e-02   |
|            | 7.248e-01 | -8.176e-07 | 1.646e-06 | 9.033e-02   | 2.503e-05  | -3.513e-02  |
|            | 4.636e-01 | -6.497e-07 | 1.257e-06 | 9.033e-02   | 2.007e-05  | -4.313e-02  |
| <b>(4)</b> |           |            |           |             |            |             |
|            | 2.368e-01 | -6.316e-06 | 3.413e-05 | 2.563e-01   | 6.960e-05  | -1.460e-01  |

#### 4. Peak search results in negative potential

**Table S4. Electrochemical peak search results in negative potential**

| MILs | Position   | Height     | Area (C)  | Width (1/2) | Derivative | Ep-Ep/2 (V) |
|------|------------|------------|-----------|-------------|------------|-------------|
| (1)  | -5.640e-01 | -2.065e-05 | 8.153e-05 | 1.855e-01   | 3.051e-04  | -9.712e-02  |
|      | -2.417e-01 | 1.816e-05  | 9.480e-05 | 2.490e-01   | 1.921e-04  | 1.405e-01   |
| (2)  | -5.835e-01 | -2.744e-06 | 6.370e-06 | 1.025e-01   | 1.036e-04  | -4.425e-02  |
|      | -2.515e-01 | 9.574e-06  | 4.646e-05 | 2.319e-01   | 1.072e-04  | 1.209e-01   |
| (3)  | -4.599e-01 | -8.575e-06 | 1.956e-05 | 1.099e-01   | 2.273e-04  | -4.640e-02  |
|      | -3.745e-01 | 8.860e-06  | 1.984e-05 | 1.099e-01   | 2.247e-04  | 4.892e-02   |
| (4)  | -5.492e-01 | -1.554e-05 | 5.592e-05 | 1.685e-01   | 2.626e-04  | -9.090e-02  |
|      | -2.782e-01 | 1.229e-05  | 5.096e-05 | 2.026e-01   | 1.676e-04  | 1.131e-01   |
| (5)  | -5.518e-01 | -7.858e-06 | 2.663e-05 | 1.611e-01   | 1.363e-04  | -8.025e-02  |
|      | -3.003e-01 | 1.146e-05  | 5.693e-05 | 2.368e-01   | 1.228e-04  | 1.061e-01   |
| (6)  | -2.295e-01 | 2.070e-05  | 1.394e-04 | 2.832e-01   | 1.789e-04  | 1.367e-01   |
|      | -7.104e-01 | -5.796e-06 | 2.804e-05 | 2.197e-01   | 1.096e-04  | -8.528e-02  |
| (7)  |            |            |           |             |            |             |



---

|                 |                 |                |                |                |                 |
|-----------------|-----------------|----------------|----------------|----------------|-----------------|
| $-2.075e^{-01}$ | $1.662e^{-05}$  | $1.205e^{-04}$ | $3.076e^{-01}$ | $1.417e^{-04}$ | $1.369e^{-01}$  |
| $-6.519e^{-01}$ | $-2.127e^{-05}$ | $1.170e^{-04}$ | $2.612e^{-01}$ | $2.326e^{-04}$ | $-1.437e^{-01}$ |

---

(8)

---

|                 |                 |                |                |                |                 |
|-----------------|-----------------|----------------|----------------|----------------|-----------------|
| $-1.270e^{-01}$ | $1.655e^{-05}$  | $1.221e^{-04}$ | $3.076e^{-01}$ | $1.712e^{-04}$ | $1.727e^{-01}$  |
| $-9.863e^{-01}$ | $-2.214e^{-07}$ | $4.505e^{-07}$ | $1.025e^{-01}$ | $8.034e^{-06}$ | $-5.513e^{-02}$ |

---

## 5. Mass spectrometry

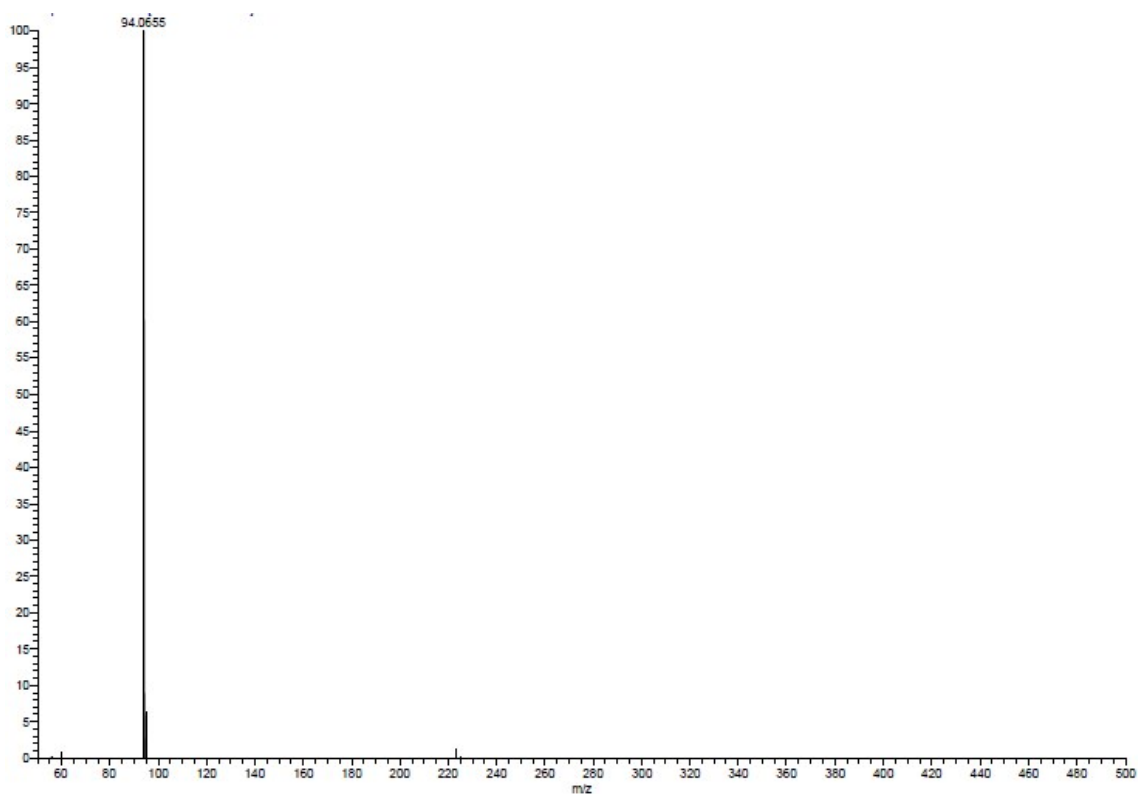

Figure S1. ESI<sup>+</sup> mass spectrum for (1)

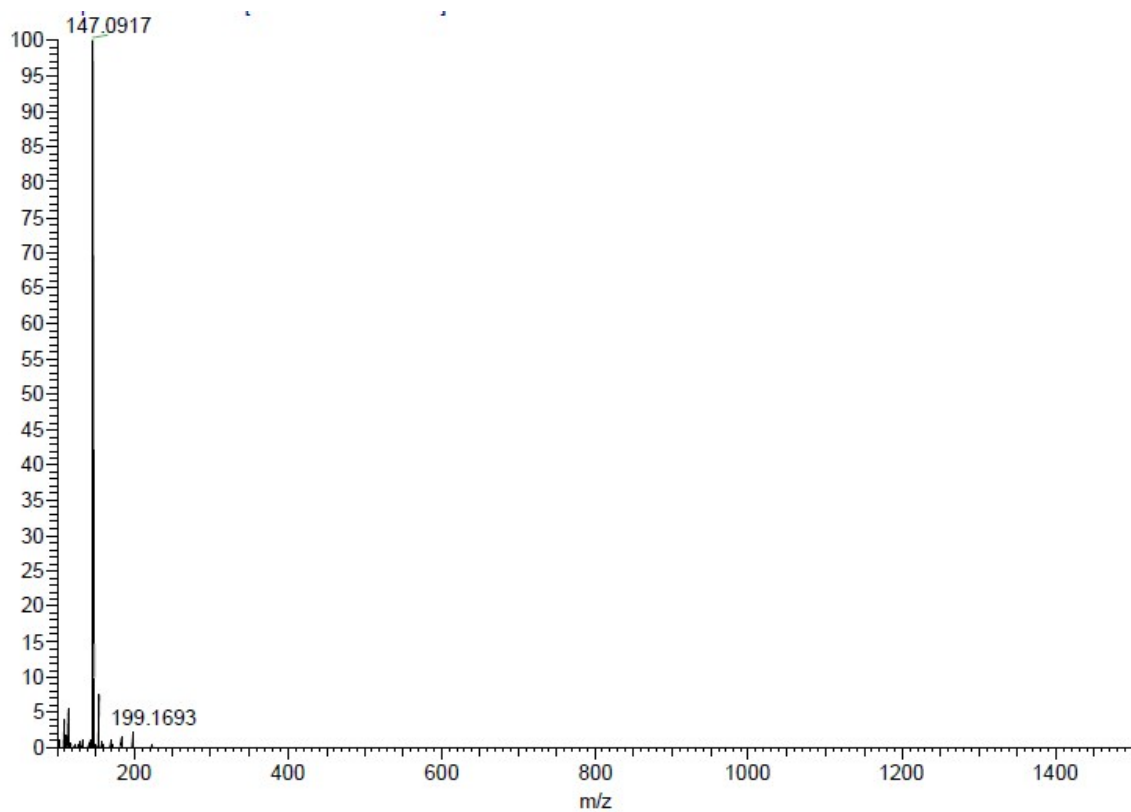

**Figure S2.** ESI<sup>+</sup> mass spectrum for (2)

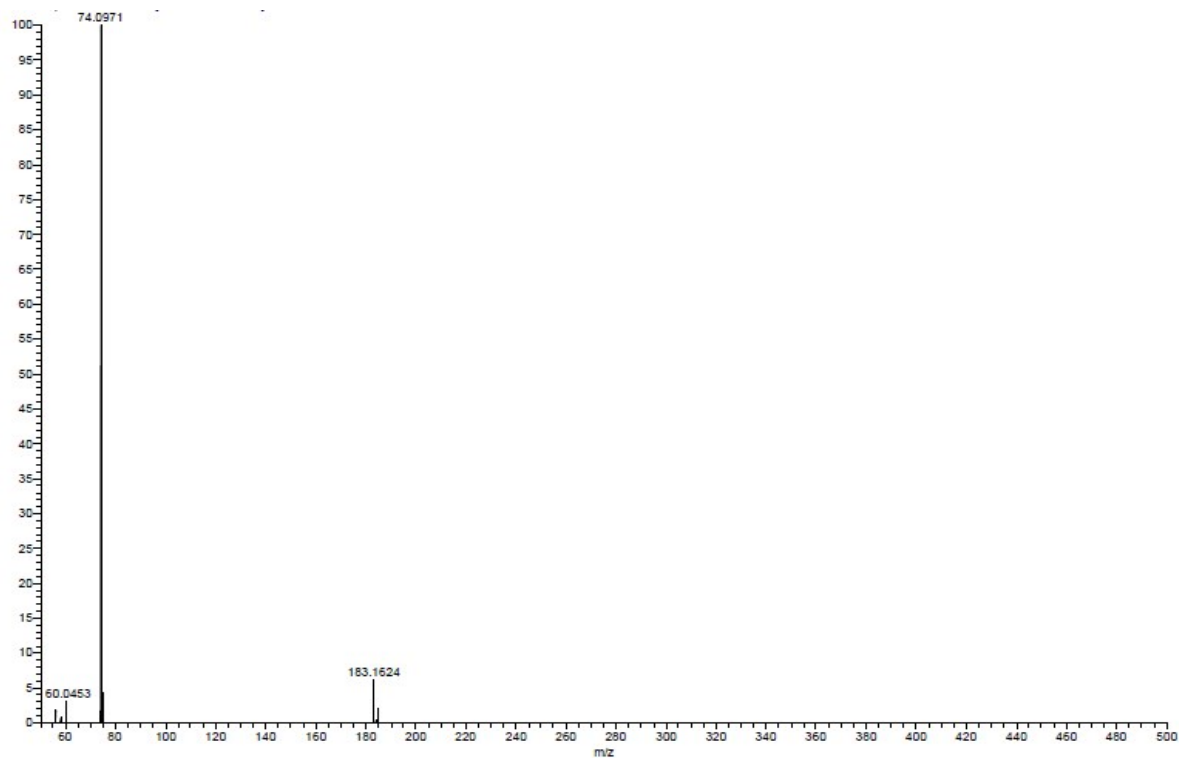

**Figure S3.** ESI<sup>+</sup> mass spectrum for (3)

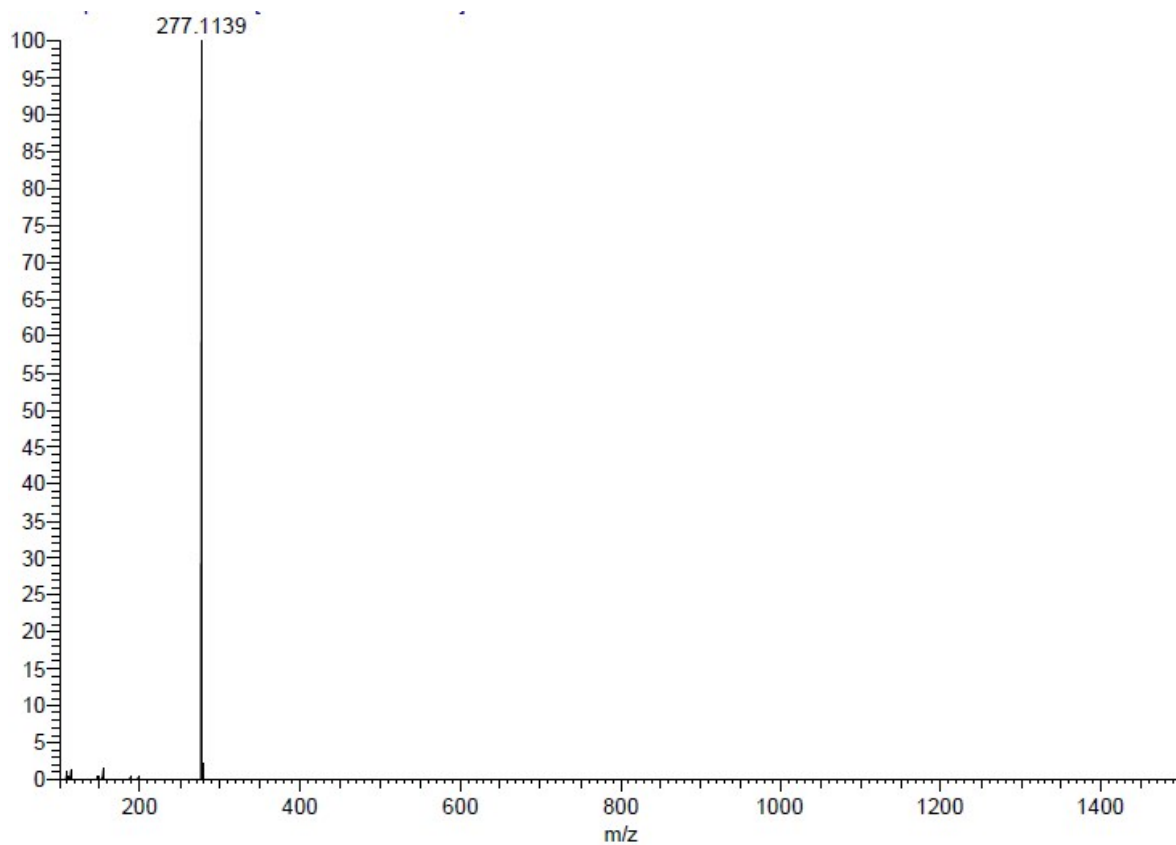

**Figure S4.** ESI<sup>+</sup> mass spectrum for (4)

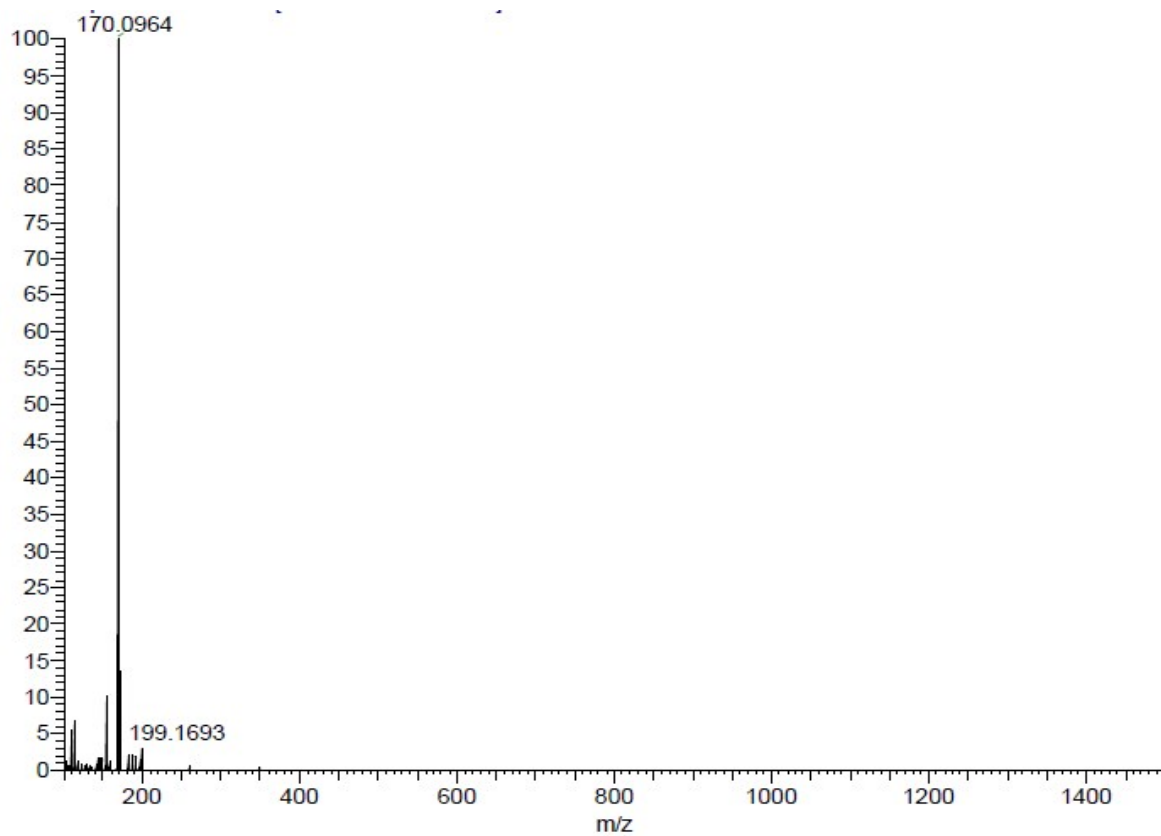

**Figure S5.** ESI<sup>+</sup> mass spectrum for (5)

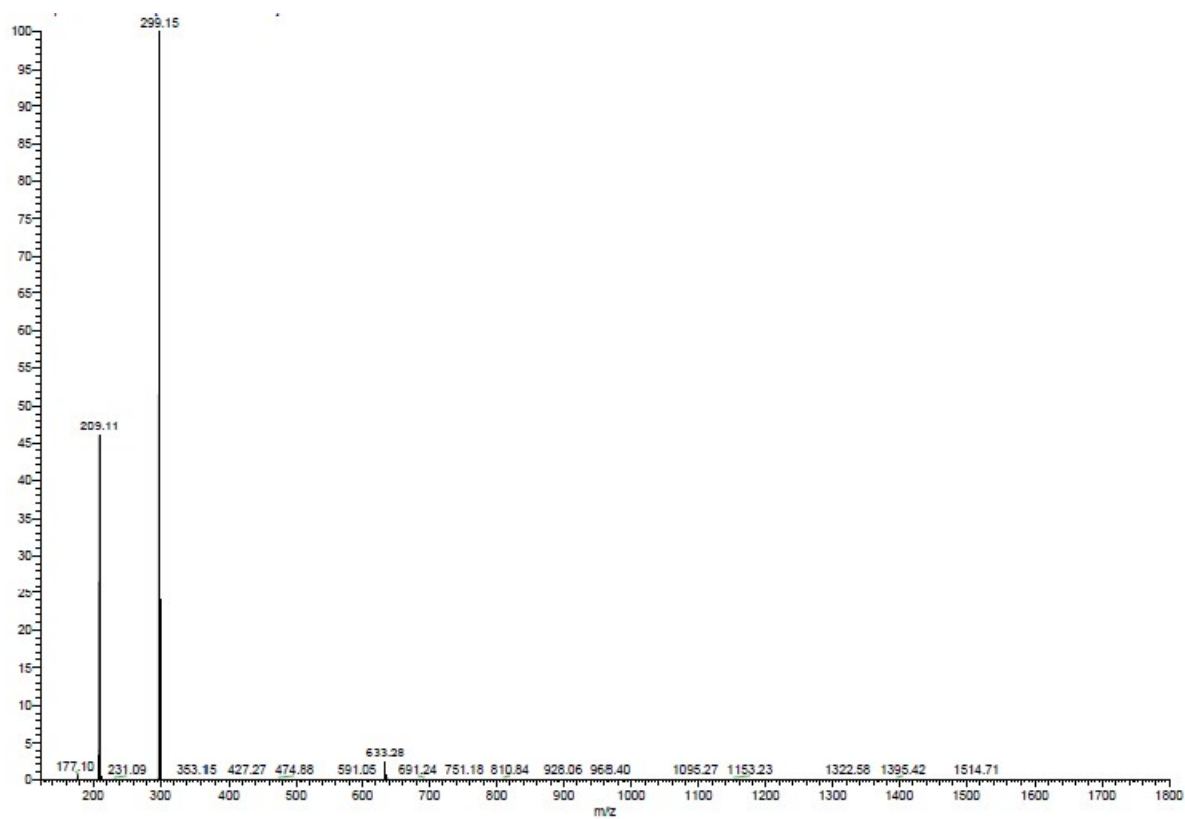

**Figure S6.** ESI<sup>+</sup> mass spectrum for (6)

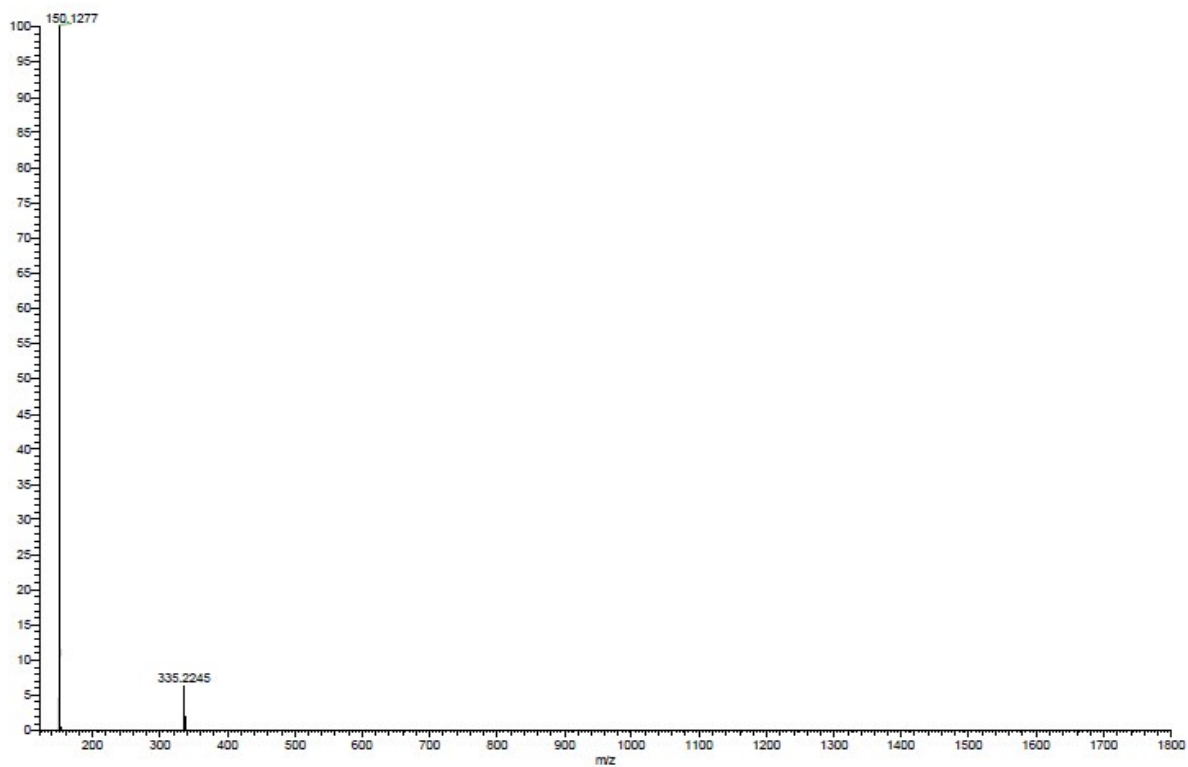

**Figure S7.** ESI<sup>+</sup> mass spectrum for (7)

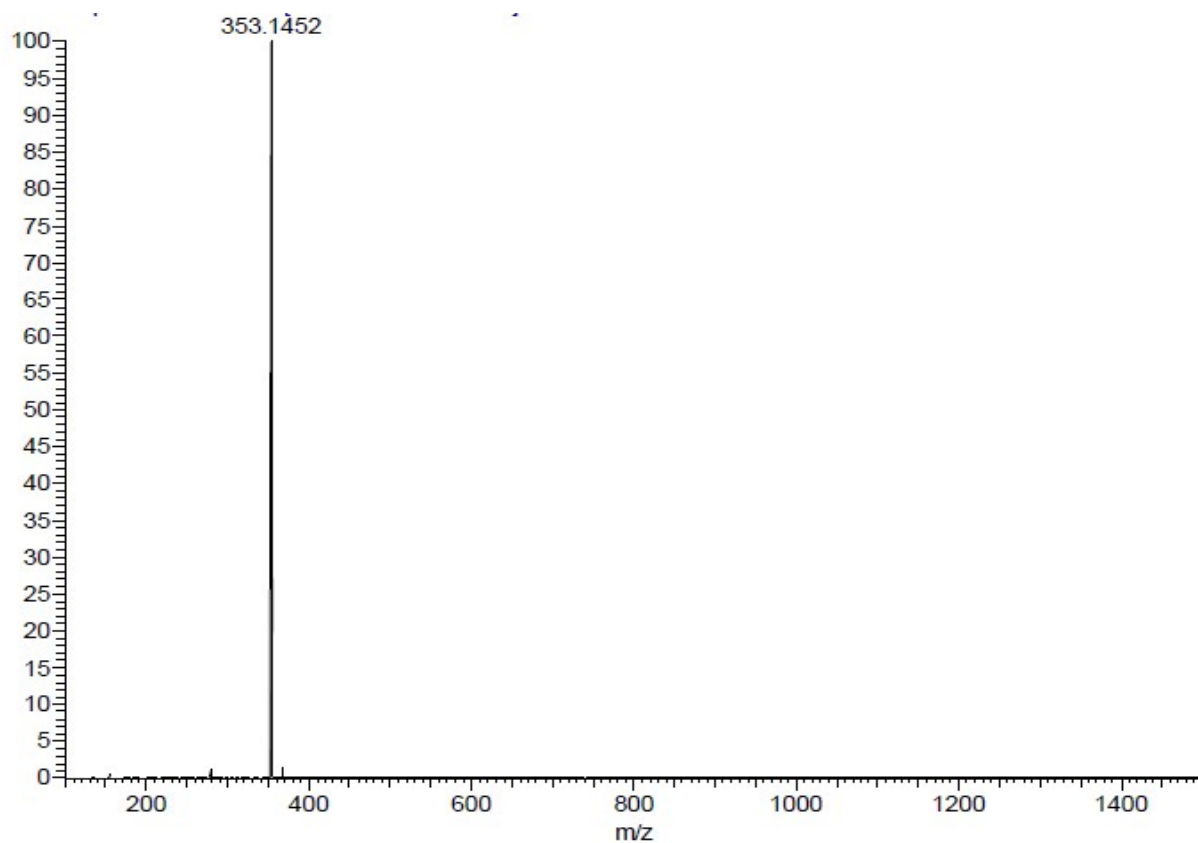

Figure S8. ESI<sup>+</sup> mass spectrum for (8)

## 6. NMR spectroscopy

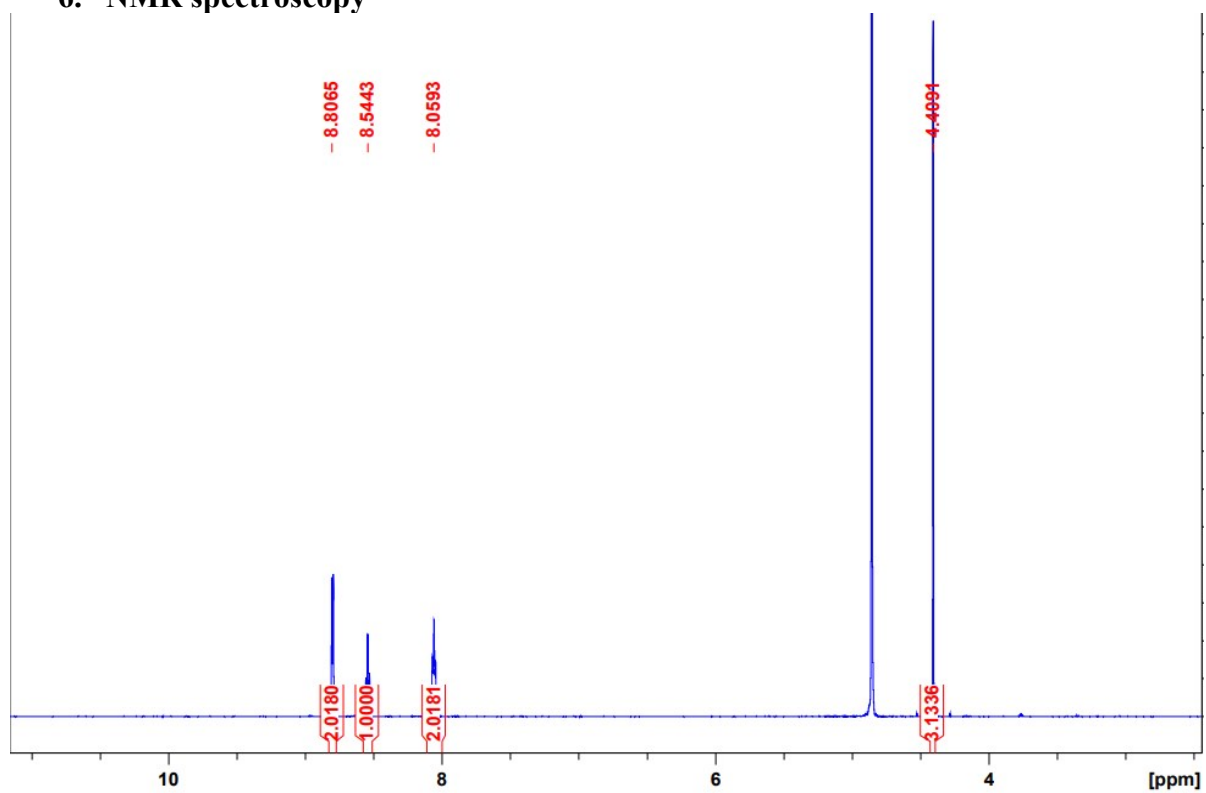

Figure S9. <sup>1</sup>H NMR spectrum for (1)

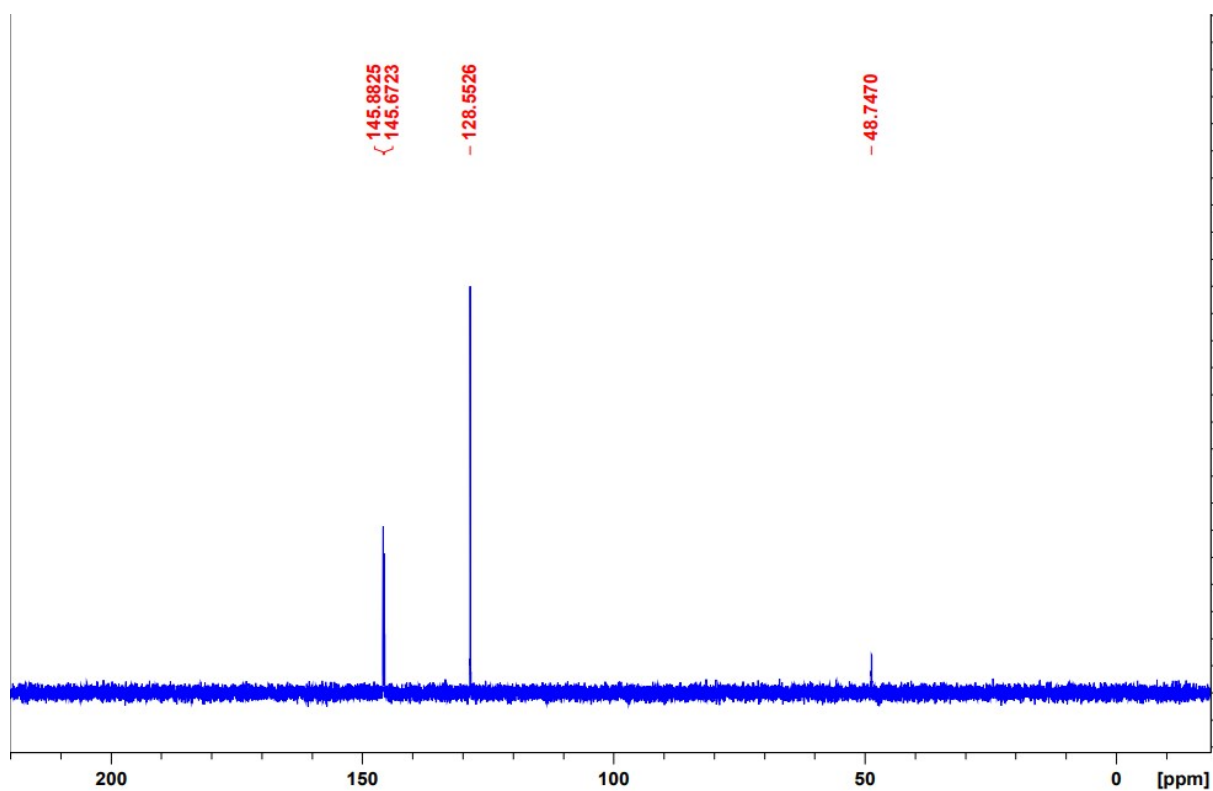

Figure S10. <sup>13</sup>C NMR spectrum for (1)

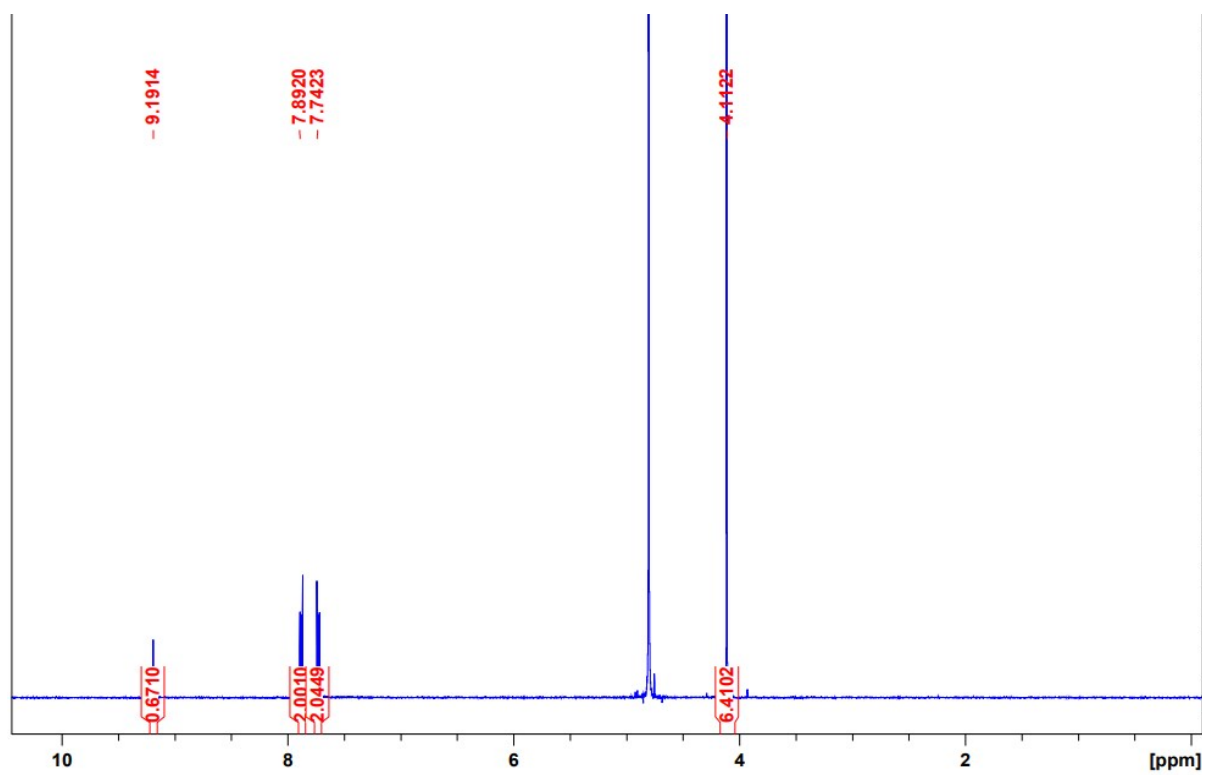

Figure S11. <sup>1</sup>H NMR spectrum for (2)

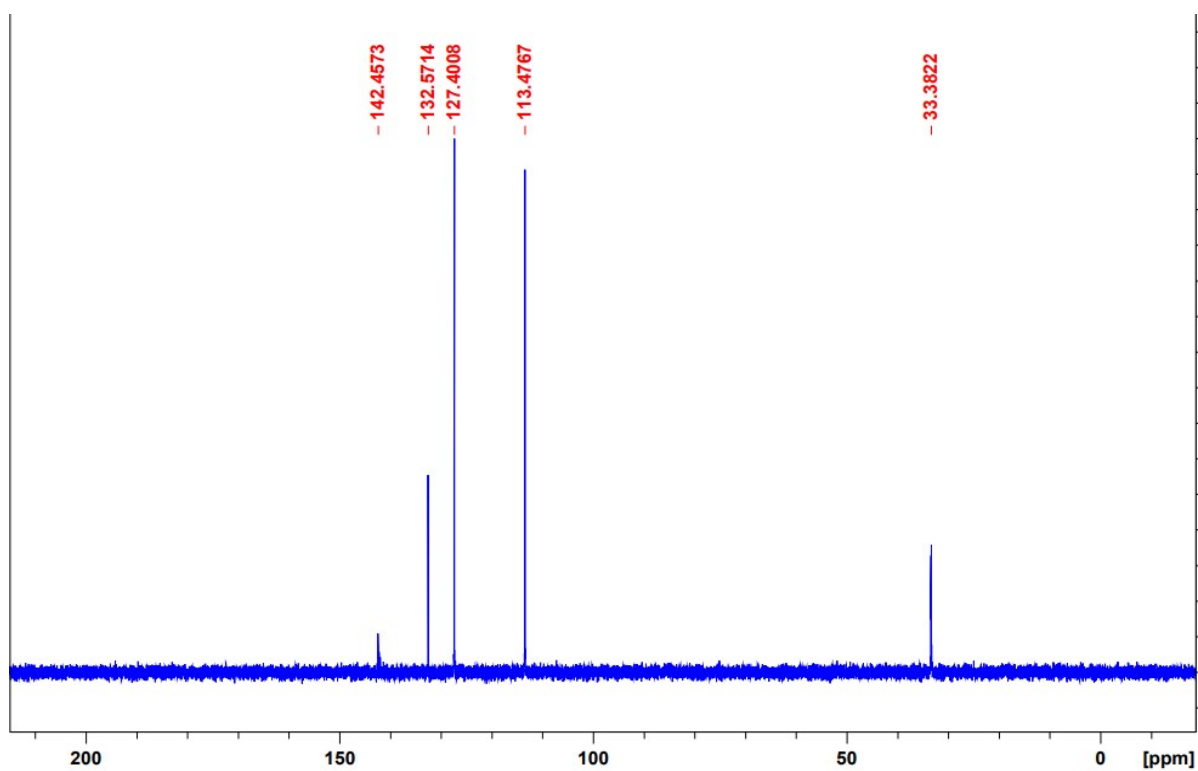

Figure S12. <sup>13</sup>C NMR spectrum for (2)

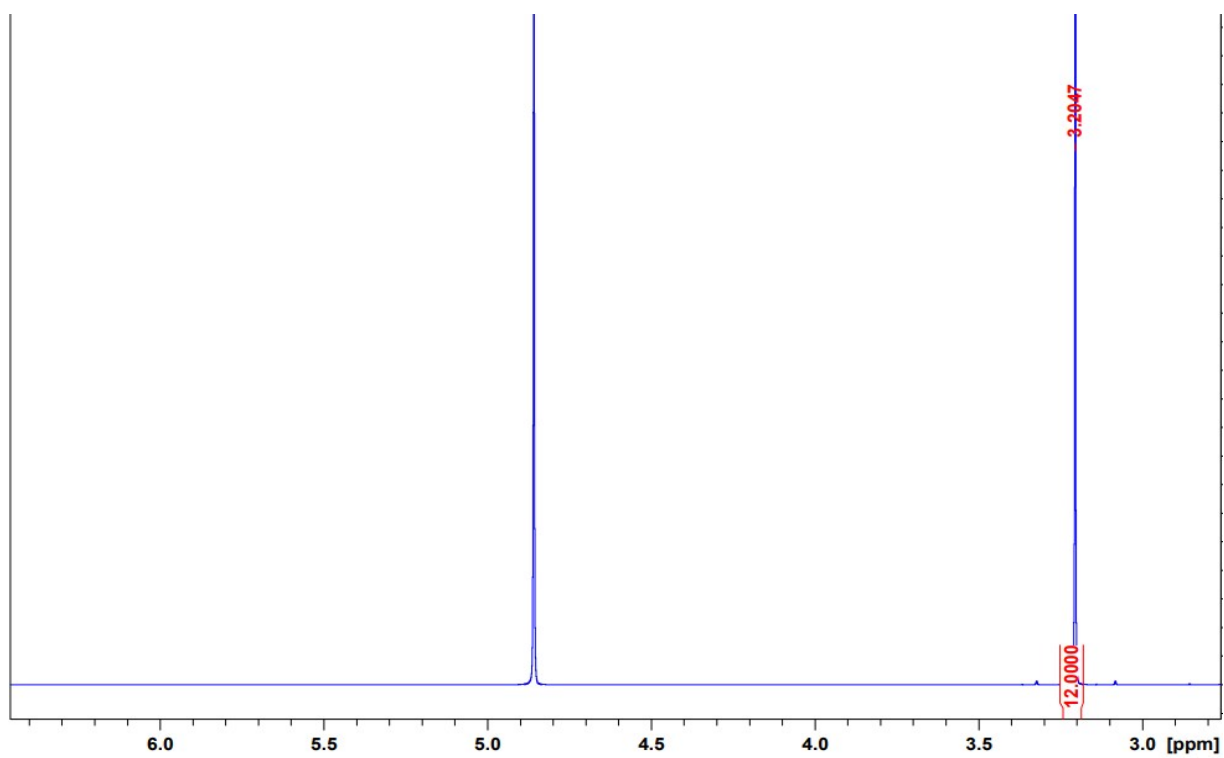

Figure S13. <sup>1</sup>H NMR spectrum for (3)

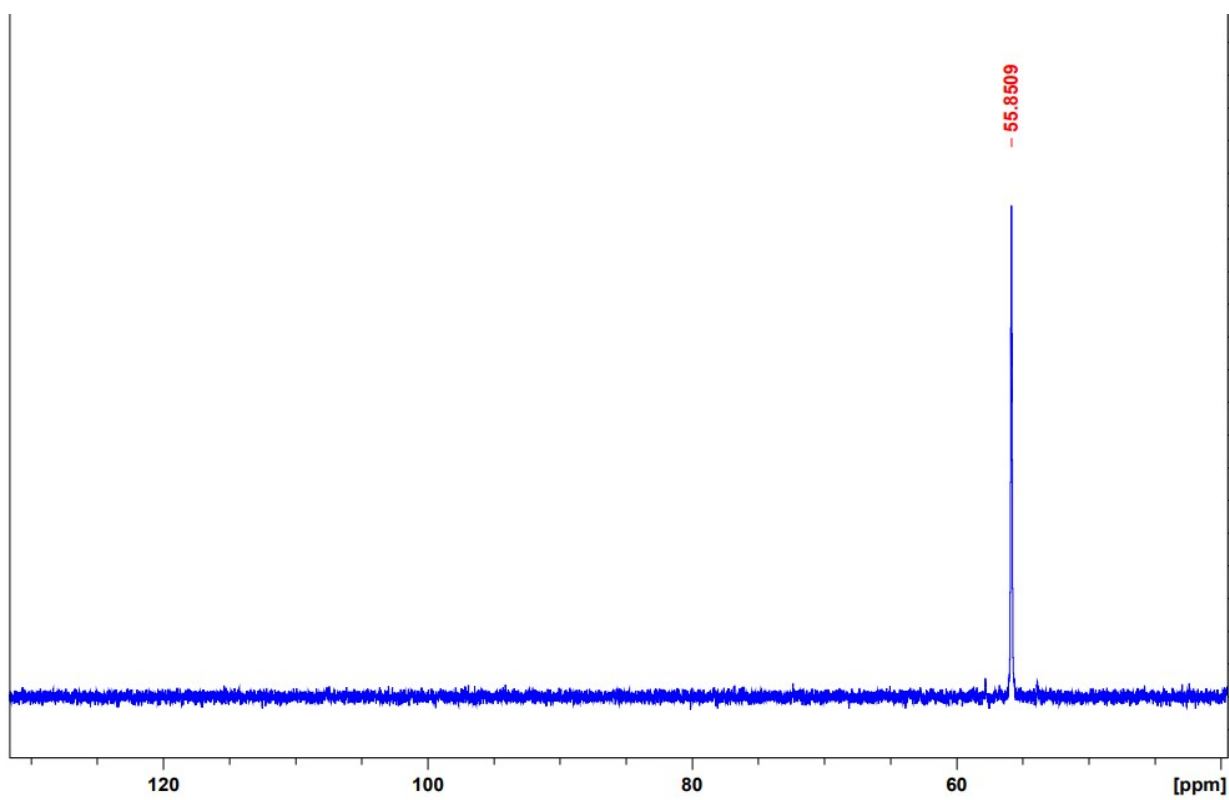

**Figure S14.**  $^{13}\text{C}$  NMR spectrum for (3)



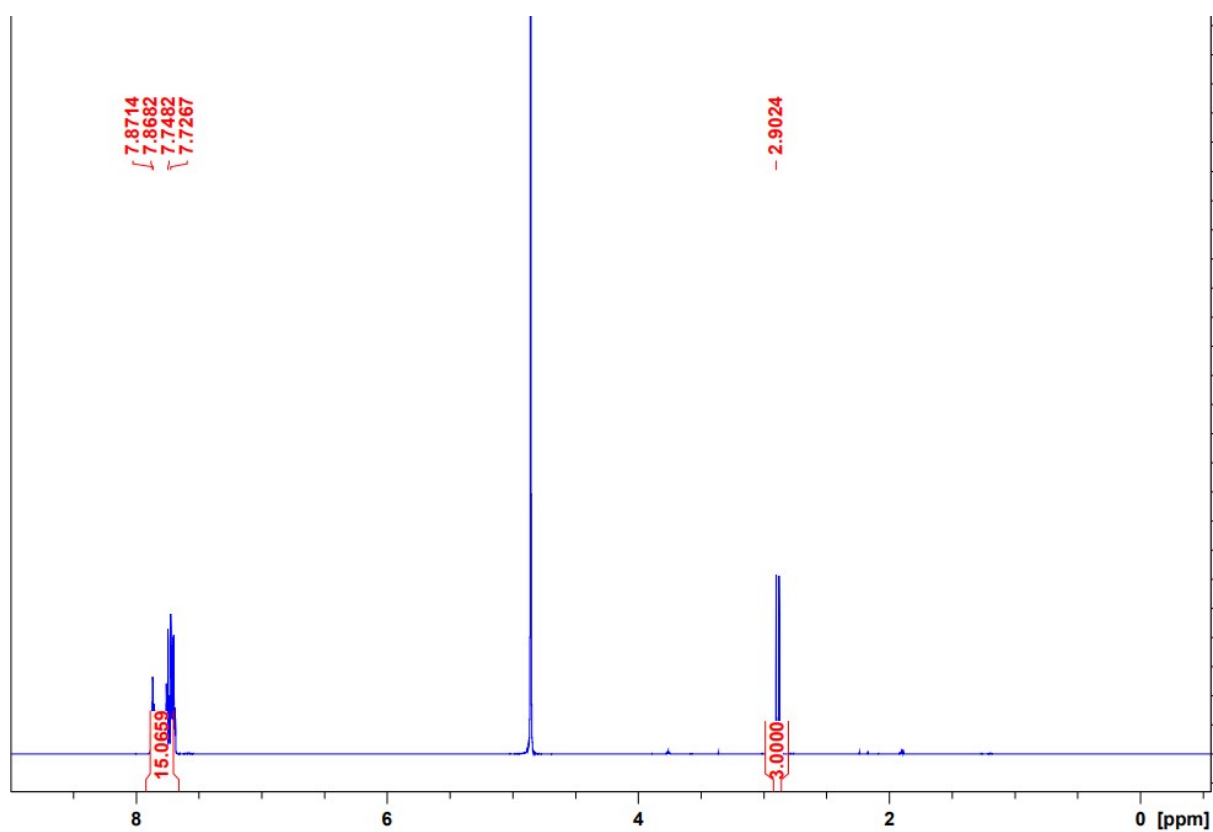

Figure S15. <sup>1</sup>H NMR spectrum for (4)

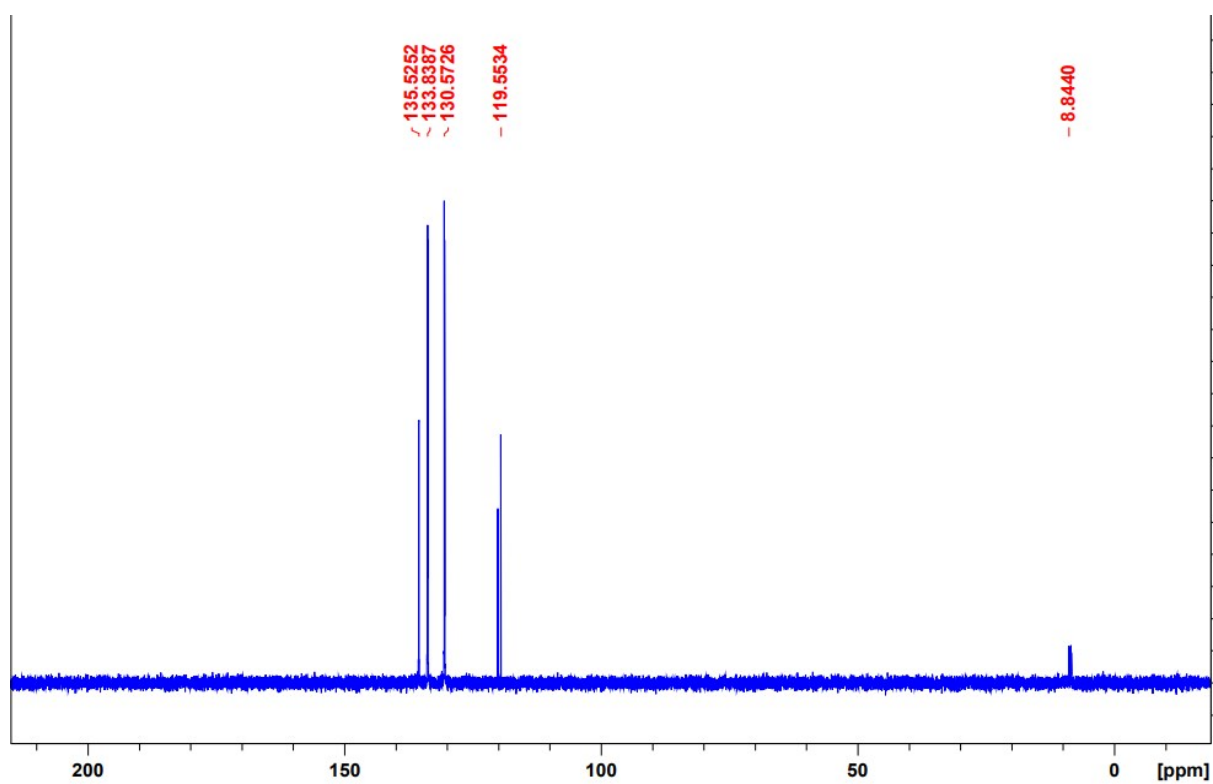

Figure S16. <sup>13</sup>C NMR spectrum for (4)

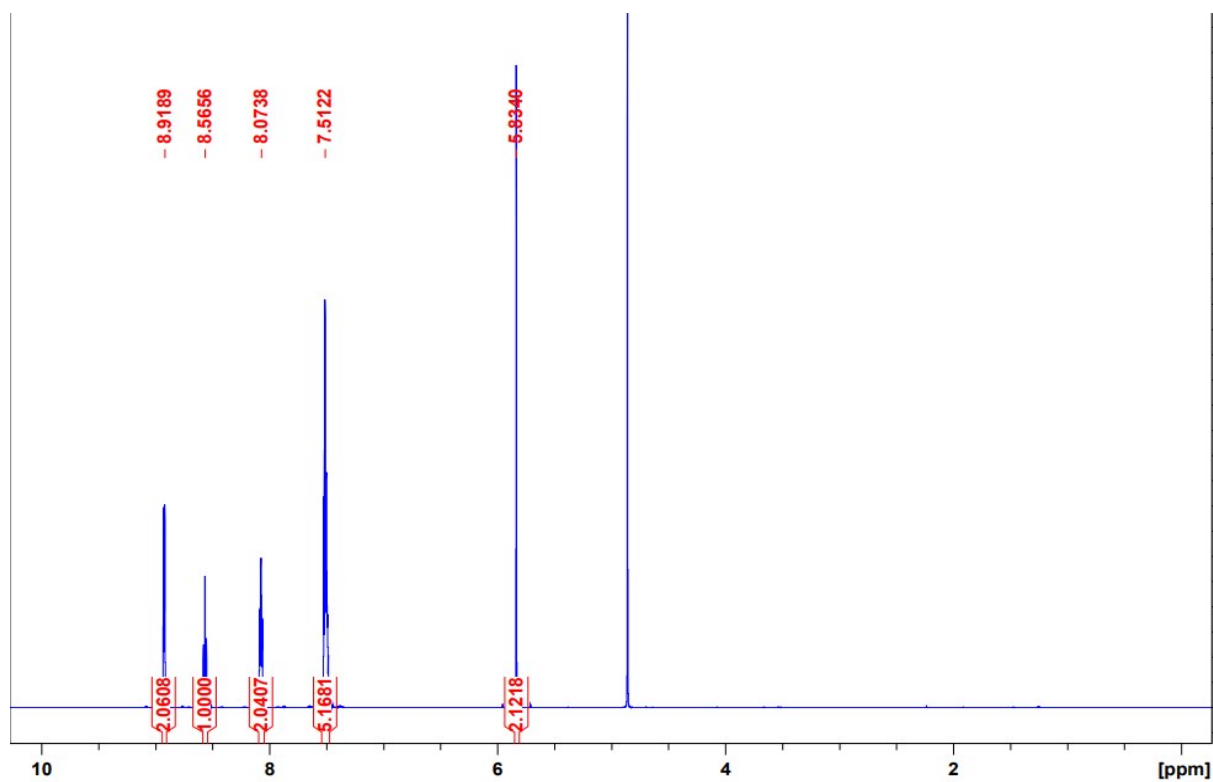

Figure S17.  $^1\text{H}$  NMR spectrum for (5)

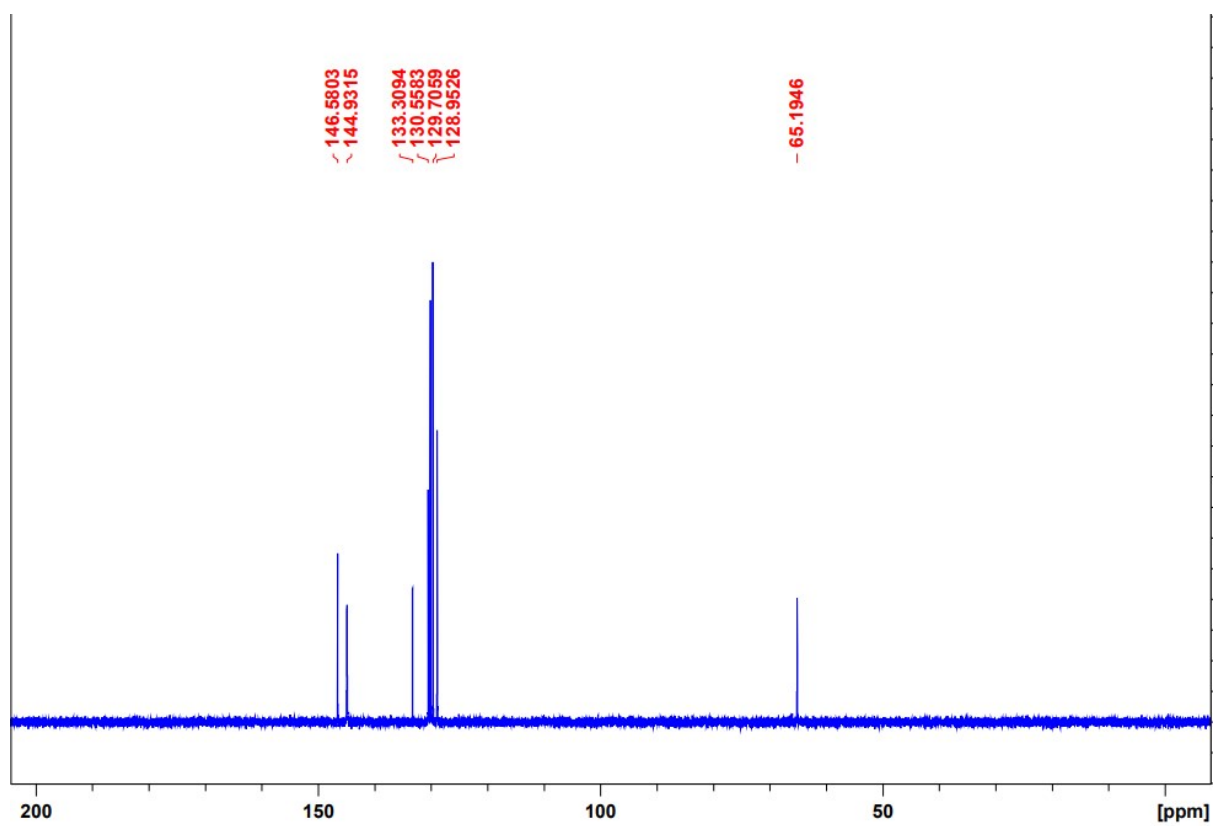

Figure S18.  $^{13}\text{C}$  NMR spectrum for (5)

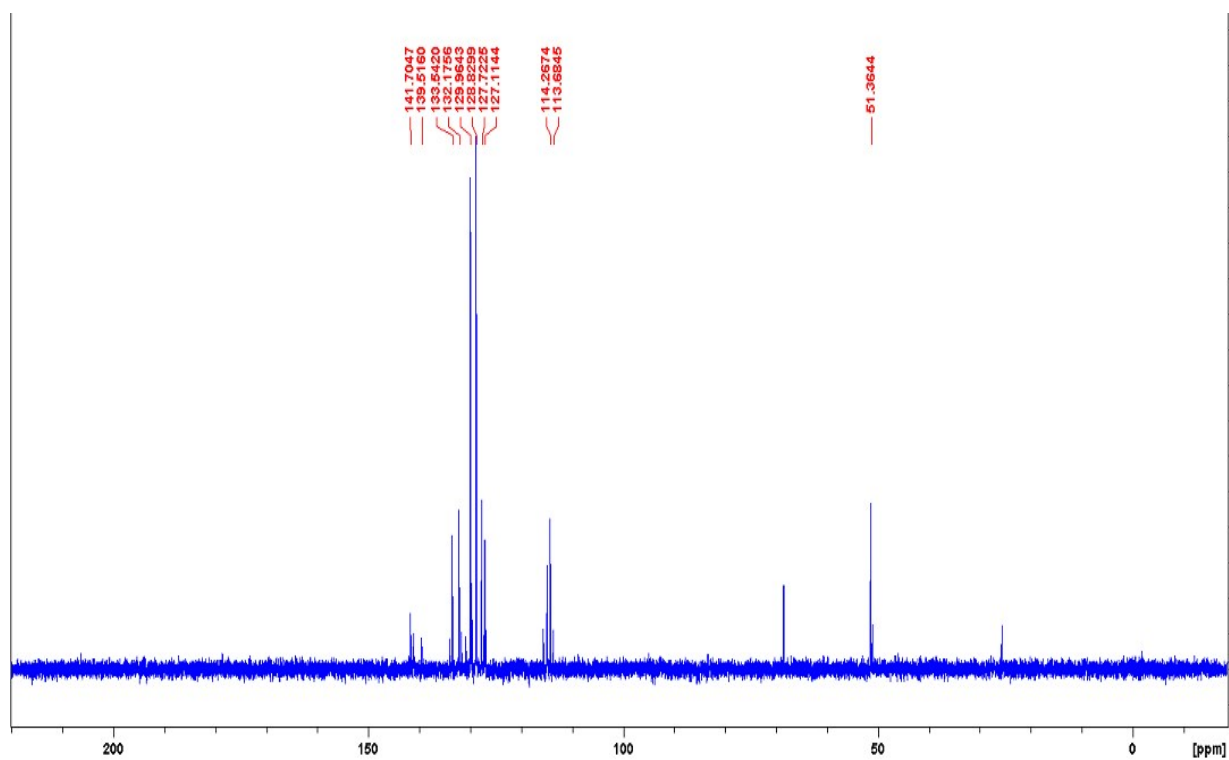

Figure S19. <sup>13</sup>C NMR spectrum for (6)

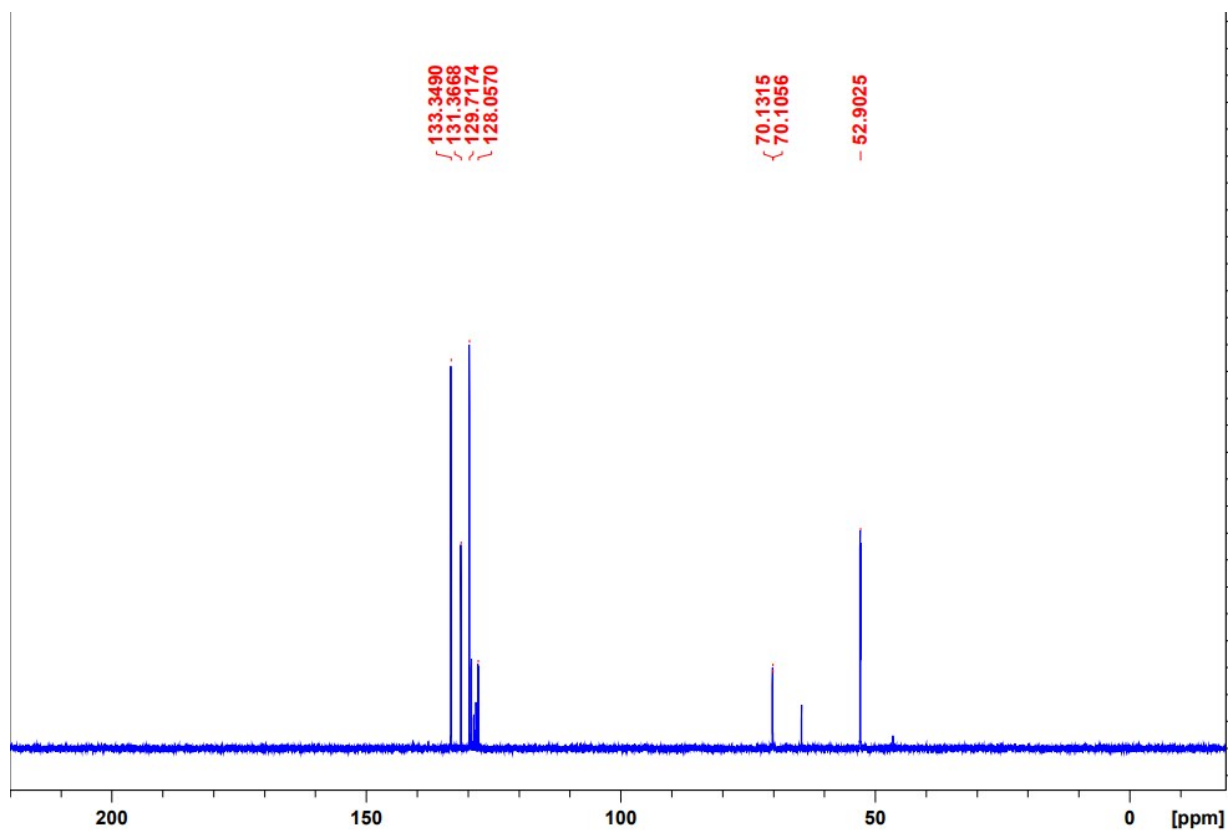

Figure S20. <sup>13</sup>C NMR spectrum for (7)

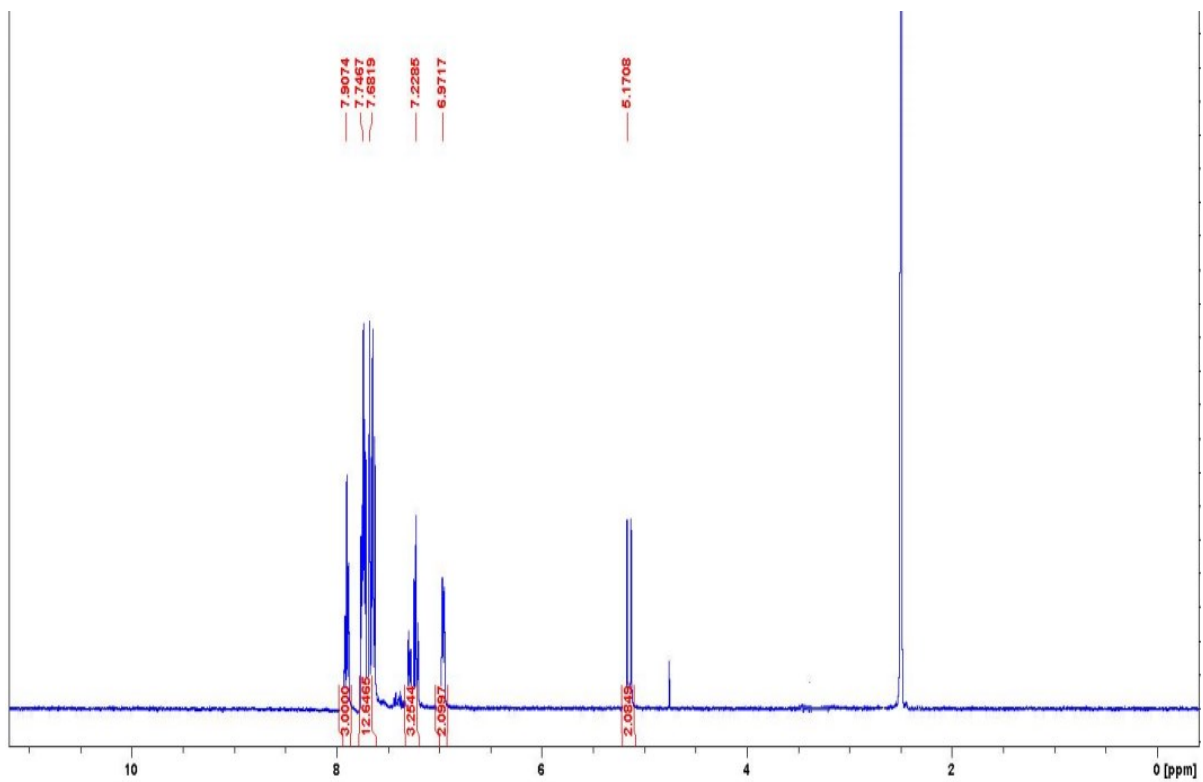

Figure S21.. <sup>1</sup>H NMR spectrum for (8)

## 7. Raman Spectroscopy

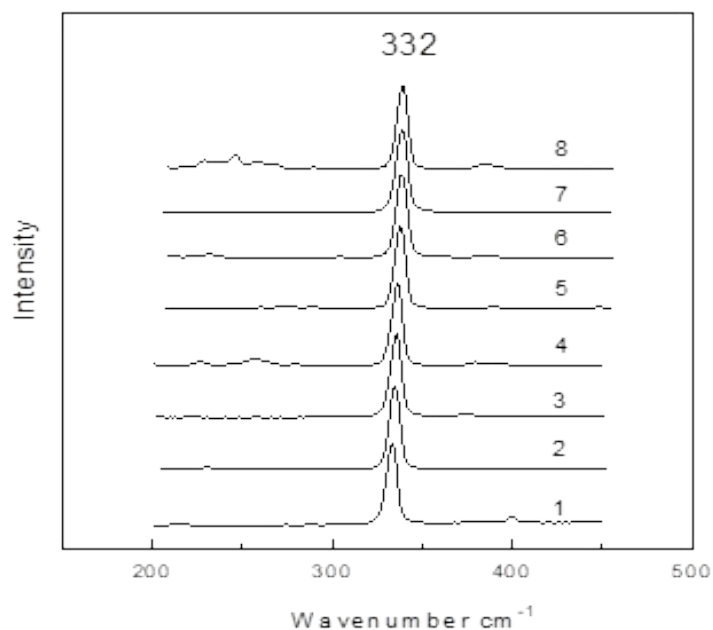

**Figure S22.** Raman spectra for compounds (1-8) – see main manuscript for compound numbers

## 8. Magnetic studies

**Table S5.**

molar  
for (1-8)

Gram and  
susceptibilities

| MILs | $(\chi_g)$<br>(emu.g <sup>-1</sup> Oe <sup>-1</sup> ) | $(\chi_{mol})^{(corr)}$<br>(emu.mol <sup>-1</sup> Oe <sup>-1</sup> ) |
|------|-------------------------------------------------------|----------------------------------------------------------------------|
| 1    | $45 \times 10^{-6}$                                   | 0.013                                                                |
| 2    | $34 \times 10^{-6}$                                   | 0.011                                                                |
| 3    | $46 \times 10^{-6}$                                   | 0.012                                                                |
| 4    | $31 \times 10^{-6}$                                   | 0.015                                                                |
| 5    | $35 \times 10^{-6}$                                   | 0.013                                                                |
| 6    | $32 \times 10^{-6}$                                   | 0.013                                                                |
| 7    | $41 \times 10^{-6}$                                   | 0.014                                                                |
| 8    | $26 \times 10^{-6}$                                   | 0.015                                                                |
